# Supplementary material for: Assessing Parental Knowledge, Attitudes, and Practices Towards Antibiotic Use in Children: A Study in a teaching and training Tertiary Care Hospital in Mogadishu, Somalia
Source: Research Square preprint supplement (doi:10.21203/rs.3.rs-5795463/v1), 2025-01-17
Supplement: Supplementary file 1 [file 223502c00a01317e2be97891.docx]

**Table 1. Sociodemographic Characteristics**

| **Parameters** | | **N** | **%** |
| --- | --- | --- | --- |
| Age | 20-30  31-40  41-50  51-60 | 157  136  28  4 | 48.3  41.8  8.6  1.2 |
| Gender | Male  Female | 100  225 | 30.8  69.2 |
| Marital status | Married  Unmarried | 269  56 | 82.8  17.2 |
| Fathers Education | Illiterate  Primary school  Secondary school  Diploma  University level | 88  115  29  52  41 | 27.1  35.4  8.9  16  12.6 |
| Mothers Education | Illiterate  Prımary school  Secondary school  Diploma  University level | 106  100  48  53  18 | 32.6  30.8  14.8  16.3  5.5 |
| Number of children | 1 or 2  >2 | 74  251 | 22.8  77.2 |
| Residency | City  Village  Region | 208  73  44 | 64  22.5  13.5 |

**Table 2. Knowledge, Attitudes and Behaviors of Parents about Antibiotics**

| **Questions** | **Responses** | **N** | **%** |
| --- | --- | --- | --- |
| Treat bacteria | Yes  No  No idea | 47  128  150 | 14.5  39.4  46.2 |
| Treat viruses | Yes  No  No idea | 114  132  79 | 35.1  40.6  24.3 |
| Makes allergy in children | Yes  No  No idea | 256  42  27 | 78.8  12.9  8.3 |
| Used in the cold | Yes  No  No idea | 209  109  7 | 64.3  33.5  2.2 |
| If the cure is not completed, the treatment is incomplete | Yes  No  No idea | 40  212  73 | 12.3  65.2  22.5 |
| It is healthier to take less antibiotics than prescribed than to take the full course prescribed | Yes  No | 227  98 | 69.8  30.2 |
| Penicillin is an antibiotic | Yes  No  No idea | 188  58  79 | 57.8  17.8  24.3 |
| Colds are caused by viruses | Yes  No  No idea | 157  86  82 | 48.3  26.5  25.2 |
| Unnecessary use stimulates resistance | Yes  No  No idea | 98  69  158 | 30.2  21.2  48.6 |
| It is good to be able to ask close friends for help without having to see a doctor | Agree  Disagree | 123  202 | 37.8  62.2 |
| It is good to be able to buy antibiotics from the pharmacy without a prescription | Yes  No | 188  137 | 57.8  42.2 |
| Sore throat needs antibiotics or it will get worse | Yes  No | 232  93 | 71.4  28.6 |
| Antibiotics speed up the recovery of a cold | Agree  Disagree | 182  143 | 56  44 |
| I usually stop giving my child antibiotics when they start to feel better. | Agree  Disagree | 197  128 | 60.6  39.4 |
| I stop giving antibiotics if my child has a skin reaction or side effectsTrue | Agree  Disagree | 288  37 | 88.6  11.4 |
| I usually check the expiration date before giving antibiotics to my child | Agree  Disagree | 183  142 | 56.3  43.7 |
| If the doctor doesn't give antibiotics, I won't be satisfied | Agree  Disagree | 155  170 | 47.7  52.3 |
| Doctors usually always inform parents about this | Agree  Disagree | 165  160 | 50.8  49.2 |
| I give antibiotic for every fever | Agree  Disagree | 118  207 | 36.3  63.7 |
| Bought antibiotics without a doctor's prescription | Always  Sometimes  Never  Often | 125  120  57  23 | 38.5  36.9  17.5  7.1 |
| Stores antibiotics at home | Always  Sometimes  Often | 132  136  57 | 40.6  41.8  17.5 |
| I give antibiotics to my children myself | Yes  No | 197  128 | 60.6  39.4 |
| I don't go to the doctor unless it's serious | Yes  No | 218  107 | 67.1  32.9 |
| I also use it with pharmacist recommendation | Yes  No | 218  107 | 67.1  32.9 |
| I always complete the cure. | Agree  Disagree | 197  128 | 60.6  39.4 |
| I'll use the leftovers. | Always  Sometimes  Never  Often | 132  92  66  35 | 40.6  28.3  20.3  10.8 |

**Table 3. Responses with a Significant Relationship with Socio-demographic Structure**

| **Age groups, (N=325), (p-value)** |
| --- |
| Treat viruses; (20-30=No, N=74), (0.005)  If the cure is not completed, the treatment is incomplete; (31-40=No, N=99), (0.014)  Taking less antibiotics than prescribed;(20-30=Yes, N=117), (0.046)  Taking antibiotics from a neighbor; (20-30=Disagre, N=111), (0.015)  Complete the cure even if you get better; (20-30=Agree, N=104), (0.022) |
| **Gender,(N=325), (p-value)** |
| Treat bacteria; (F=No, N=101), (0.001)  Treat viruses; (F=No, N=100), (<0.001)  If the cure is not completed, the treatment is incomplete;(F=No, N=139), (0.044)  Taking less antibiotics than prescribed; (F=Yes, N=145), (0.002)  Unnecessary use stimulates resistance; (F=No idea, N=89), (<0.001)  If the doctor doesn't give antibiotics, I won't be satisfied;(F=Disagre, N=127), (0.030)  Bought antibiotics without a doctor's prescription;(F=Sometimes, N=80), (0.023)  Stores antibiotics at home; (F=Sometimes, N=94), (0.034) |
| **Marital status,(N=325), (p-value)** |
| If the cure is not completed, the treatment is incomplete;(M=No, N=188), (<0.001)  Penicillin is an antibiotic; (M=Yes, N=158), (0.020)  If the doctor doesn't give antibiotics, I won't be satisfied; (M=Agree, N=137), (0.012)  I give antibiotic for every fever;(M=Disagree, N=164), (0.032) |
| **Father education,(N=325), (p-value)** |
| Taking less antibiotics than prescribed;(P=Yes, N=87), (0.024)  Bought antibiotics without a doctor's prescription; (P=Yes, N=79), (0.019)  I also use it with pharmacist recommendation; (P=Yes, N=91), (0.002)  I always complete the cure; (P=Agree, N=70), (0.048) |
| **Mother education,(N=325), (p-value)** |
| Used in the cold; (P=Yes, N=75), (0.002)  Bought antibiotics without a doctor's prescription; (I=Yes, N=69), (<0.001)  Sore throat needs antibiotics or it will get worse; (I=Yes, N=78), (0.011)  I stop when my child feels better;(P=Yes, N=66), (0.017)  I stop if there are side effects; (P=Yes, N=89), (0.035)  I check the expiration date; (I=Agree, N=59), (<0.001)  I give antibiotic for every fever; (P=Disagree, N=78), (0.001)  I also buy on pharmacist's advice; (P=Yes, N=83), (0.001)  Complete the cure even if you get better; (U=Disagree, N=2), (<0.001) |
| **Number of children,(N=325), (p-value)** |
| Makes allergy in children; (>2=Yes, N=205), (0.006)  Used in the cold; (>2=Yes, N=170), (0.032)  I give antibiotics to my children myself; (>2=Yes, N=144), (0.030)  I don't go to the doctor unless it's serious; (>2=Yes, N=160), (0.024) |
| **Residence, (N=325), (p-value)** |
| Treat viruses; (C=No, N=88), (0.017)  Makes allergy in children; (C=Yes, N=174), (0.016)  Penicillin is an antibiotic; (City=Yes, N=118), (0.011)  Unnecessary use stimulates resistance; (C=No idea, N=107), (0.008)  I stop if there are side effects; (C=Yes, N=192), (0.010)  I check the expiration date; (C=Yes, N=117), (0.031)  If the doctor doesn't give antibiotics, I won't be satisfied; (C=Disagree, N=109), (0.026)  I give antibiotic for every fever; (C=Disagree, N=143), (0.001)  Bought antibiotics without a doctor's prescription; (C=Sometimes, N=74), (0.006)  Stores antibiotics at home; (C=Sometimes, N=90), (0.015) |

(F):Female, (M):Married, (P):Primary school, (I):Illiterad, (U):University, (C):City.

**Table 4. Relationship between Total Knowledge Score and Demographic Data**

| **Parameters** | | **M±SD** | **Total Knowledge Score (0-24 points), (P-values)** |
| --- | --- | --- | --- |
| Age | 20-30  31-40  41-50  51-60 | 10±4  9±3.4  10±3.3  11.5±3.1 | 0.276 |
| Gender | Male  Female | 9±3.4  10±3.7 | **0.018** |
| Marital status | Married  Unmarried | 9±3.7  11±3.3 | **0.025** |
| Fathers Education | Illiterate  Primary school  Secondary school  Diploma  University level | 10±4.1  9±3.1  11±3.9  9±3.7  10±4 | 0.218 |
| Mothers Education | Illiterate  Prımary school  Secondary school  Diploma  University level | 9.5±3.5  9±2.9  9±4.1  11±4.2  12.5±4.3 | **0.008** |
| Number of children | 1 or 2  >2 | 9.5±4  9±3.6 | 0.726 |
| Residency | City  Village  Region | 9.5±3.8  9±3.8  9±2.2 | 0.355 |

M:Median, SD:Standart deaviation.
